# Supplementary material
Source: PubMed Central journal article supplement (PMC3536105)
Supplement: AEM.02496-12_zam999103951so1.pdf [file AEM.02496-12_zam999103951so1.pdf]

## SUPPLEMENTAL INFORMATION

Genomic and physiological characterization of the chromate-reducing,  
aquifer-derived firmicute *Pelosinus* sp. strain HCF1

Harry R. Beller\*, Ruyang Han, Ulas Karaoz, Hsiao Chien Lim, Eoin L. Brodie  
Earth Sciences Division, Lawrence Berkeley National Laboratory, Berkeley, CA

94720

**\*Corresponding author:**

Harry R. Beller  
Lawrence Berkeley National Laboratory  
1 Cyclotron Rd., MS 70A-3317  
Berkeley, CA 94720

E-mail        [HRBeller@lbl.gov](mailto:HRBeller@lbl.gov)  
Phone        (510) 486-7321  
Fax            (510) 486-5686

TABLE S1. PCR primers for qPCR analysis of the *rpoB*, *narG*, *nrfH1*, and *nrfH2* genes in strain HCF1.

| Primer names | Primer sequences      | Target sequences      | Purpose          |
|--------------|-----------------------|-----------------------|------------------|
| rpoB_116F    | TAAAGGAAGGGCTGCAAGAA  | Hcf1DRAFT_04198 rpoB  | PCR <sup>a</sup> |
| rpoB_1841R   | TTTGCATCATCGTTTTCCAA  | Hcf1DRAFT_04198 rpoB  | PCR              |
| rpoB_1179F   | ATTGCTGCAAAACCAATTCC  | Hcf1DRAFT_04198 rpoB  | qPCR             |
| rpoB_1313R   | TTGATAGCAGCCACAACAGG  | Hcf1DRAFT_04198 rpoB  | qPCR             |
| narG_294F    | GGGAGCTAGCTTCTCCTGGT  | Hcf1DRAFT_02301 narG  | PCR              |
| narG_1834R   | CATACTGCCACTGGTTGGTG  | Hcf1DRAFT_02301 narG  | PCR              |
| narG_551F    | CTTATGGACCTGACCGCATT  | Hcf1DRAFT_02301 narG  | qPCR             |
| narG_687R    | GGGCAAATCTGCATAACCAGT | Hcf1DRAFT_02301 narG  | qPCR             |
| nrfH1_10F    | GGGAAATTCCTGGAGCGTAG  | Hcf1DRAFT_00451 nrfH1 | PCR              |
| nrfH1_471R   | TTCAACGTAAACCCCTCCTG  | Hcf1DRAFT_00451 nrfH1 | PCR              |
| nrfH1_89F    | GCGCAGGGTTTGTATATTCC  | Hcf1DRAFT_00451 nrfH1 | qPCR             |
| nrfH1_218    | TCATGAGGAACATGGCAGTC  | Hcf1DRAFT_00451 nrfH1 | qPCR             |
| nrfH2_13F    | CAGTTTTTAAACCGCAATGCT | Hcf1DRAFT_02324 nrfH2 | PCR              |
| nrfH2_463R   | TTATCCCCCTTTGCTCTTG   | Hcf1DRAFT_02324 nrfH2 | PCR              |
| nrfH2_115F   | CCAGGGTTTTGTGGAAGTTG  | Hcf1DRAFT_02324 nrfH2 | qPCR             |
| nrfH2_226    | CAAAATTCTGCTGTGGCAA   | Hcf1DRAFT_02324 nrfH2 | qPCR             |

<sup>a</sup> PCR used to generate templates for calibration standards.

TABLE S2. PCR primers for qPCR analysis of hydrogenase genes in strain HCF1.

| Primer names | Primer sequences      | Target sequences | Purpose <sup>a</sup> |
|--------------|-----------------------|------------------|----------------------|
| hyd1_232F    | GCTCAGCAGGCTTTAAATGG  | Hcf1DRAFT_00661  | PCR <sup>a</sup>     |
| hyd1_1368R   | ACCAGGTCCTCCAACACATC  | Hcf1DRAFT_00661  | PCR                  |
| hyd1_485F    | TCACACGTCCCTGTGAAAGA  | Hcf1DRAFT_00661  | qPCR                 |
| hyd1_612R    | TGCACCAAAAGGACATGCTA  | Hcf1DRAFT_00661  | qPCR                 |
| hyd2_352F    | GGCATAAAACAGGTGCGATT  | Hcf1DRAFT_01773  | PCR                  |
| hyd2_1564R   | TATAAAGCCCTGCGCCTCTA  | Hcf1DRAFT_01773  | PCR                  |
| hyd2_631F    | ACAGCGAAACTCTGGAAGGA  | Hcf1DRAFT_01773  | qPCR                 |
| hyd2_745R    | CATTTTGCCCCTCTGAAAAA  | Hcf1DRAFT_01773  | qPCR                 |
| hyd3_69F     | CTCGGAAGTCTGCCCTGTAG  | Hcf1DRAFT_02066  | PCR                  |
| hyd3_1272R   | CTTTCGATAGCGCTGCTCTT  | Hcf1DRAFT_02066  | PCR                  |
| hyd3_824F    | CGGCGATTGATTTTAATGCT  | Hcf1DRAFT_02066  | qPCR                 |
| hyd3_935R    | ATCGCTGCTTCCATAACACC  | Hcf1DRAFT_02066  | qPCR                 |
| hyd4_139F    | CGCCAAGTAGCAAACCAAAT  | Hcf1DRAFT_02349  | PCR                  |
| hyd4_1165R   | TACAAGCCATGCCTTCAATG  | Hcf1DRAFT_02349  | PCR                  |
| hyd4_794F    | AACCAGATGCCAAAGTGGTC  | Hcf1DRAFT_02349  | qPCR                 |
| hyd4_902R    | AGCTCCTGAAAGGTCAGCAC  | Hcf1DRAFT_02349  | qPCR                 |
| hyd5_24F     | TCAACTGTGCATGTCAGCAA  | Hcf1DRAFT_02598  | PCR                  |
| hyd5_1095R   | TAATTCCTGCTTTGCCTGCT  | Hcf1DRAFT_02598  | PCR                  |
| hyd5_720F    | CCCTGGCAGTACAGGATGTT  | Hcf1DRAFT_02598  | qPCR                 |
| hyd5_863R    | AAATGAGGACTGGCACAACC  | Hcf1DRAFT_02598  | qPCR                 |
| hyd6_45F     | TGTAAGTCGGCGAAACTTCTT | Hcf1DRAFT_03510  | PCR                  |
| hyd6_1046R   | TGAATCGTAGAAAGTGCACCA | Hcf1DRAFT_03510  | PCR                  |
| hyd6_442F    | GCTAAAGGAGCTGCTGCAAT  | Hcf1DRAFT_03510  | qPCR                 |
| hyd6_584R    | GGGCATCCCGTACTTTAAT   | Hcf1DRAFT_03510  | qPCR                 |

<sup>a</sup> PCR used to generate templates for calibration standards.

TABLE S3. Relative transcription of six hydrogenase genes in strain HCF1.

| <b>Electron donor<sup>a</sup></b> | <b>Relative expression (transcript copy number normalized to that of <i>rpoB</i>)</b> |                         |                         |                         |                         |                         |
|-----------------------------------|---------------------------------------------------------------------------------------|-------------------------|-------------------------|-------------------------|-------------------------|-------------------------|
|                                   | <b>hyd1<sup>b</sup></b>                                                               | <b>hyd2<sup>b</sup></b> | <b>hyd3<sup>b</sup></b> | <b>hyd4<sup>b</sup></b> | <b>hyd5<sup>b</sup></b> | <b>hyd6<sup>b</sup></b> |
| Lactate                           | 0.25±0.036 <sup>c</sup>                                                               | 0.19±0.037              | 0.21±0.061              | 0.27±0.055              | 0.08±0.018              | 1.50±0.182              |
| Fructose                          | 0.19±0.037                                                                            | 0.12±0.114              | 0.21±0.098              | 0.18±0.238              | 0.04±0.024              | 1.54±0.461              |
| H <sub>2</sub>                    | 0.31±0.123                                                                            | 0.23±0.157              | 0.41±0.252              | 0.29±0.225              | 0.12±0.074              | 1.90±0.203              |

- a The sole electron donors and headspace compositions were: (a) lactate (80% N<sub>2</sub>/10% CO<sub>2</sub>), (b) fructose (80% N<sub>2</sub>/10% CO<sub>2</sub>), and (c) 90% H<sub>2</sub>/10% CO<sub>2</sub>.
- b hyd1 = Hcf1DRAFT\_00661 [FeFe]; hyd2 = Hcf1DRAFT\_01773 [FeFe];  
 hyd3 = Hcf1DRAFT\_02066 [FeFe]; hyd4 = Hcf1DRAFT\_02349 [FeFe];  
 hyd5 = Hcf1DRAFT\_02598 [NiFe]; hyd6 = Hcf1DRAFT\_03510 [NiFe]
- c Mean ± standard deviation

TABLE S4. Relative transcription of three nitrate or nitrite reductase genes in strain HCF1<sup>a</sup>

| Conditions <sup>b</sup> | Relative expression (transcript copy number<br>normalized to that of <i>rpoB</i> ) |                           |                           |
|-------------------------|------------------------------------------------------------------------------------|---------------------------|---------------------------|
|                         | <i>narG</i> <sup>c</sup>                                                           | <i>nrjH1</i> <sup>d</sup> | <i>nrjH2</i> <sup>e</sup> |
| No nitrate, 36 hr       | 0.018 ± 0.002 <sup>f</sup>                                                         | 0.053 ± 0.013             | 0.308 ± 0.067             |
| No nitrate, 72 hr       | 0.018 ± 0.002                                                                      | 0.087 ± 0.028             | 0.097 ± 0.018             |
| Nitrate, 36 hr          | 0.308 ± 0.039                                                                      | 0.062 ± 0.012             | 0.794 ± 0.235             |
| Nitrate, 72 hr          | 0.472 ± 0.148                                                                      | 0.156 ± 0.072             | 0.807 ± 0.245             |

a This table includes the experimental error for the data presented in Figure 3B.

b See text and Figure 3.

c *narG* = Hcf1DRAFT\_02301

d *nrjH* - copy 1 = Hcf1DRAFT\_00451

e *nrjH* - copy 2 = Hcf1DRAFT\_02324

f Mean ± standard deviation

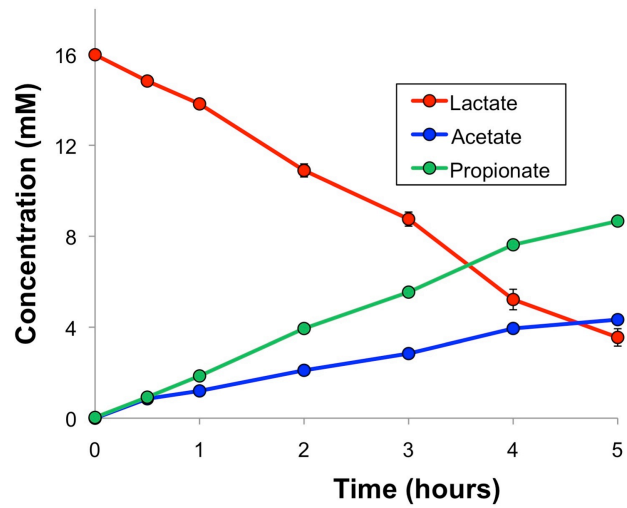

**FIGURE S1.** Fermentation of lactate to acetate and propionate in anaerobic cell suspensions of strain HCF1. Cell densities were approximately  $1.3 \times 10^9$  cells/mL. Data points represent averages of duplicates and error bars represent 1 standard deviation.

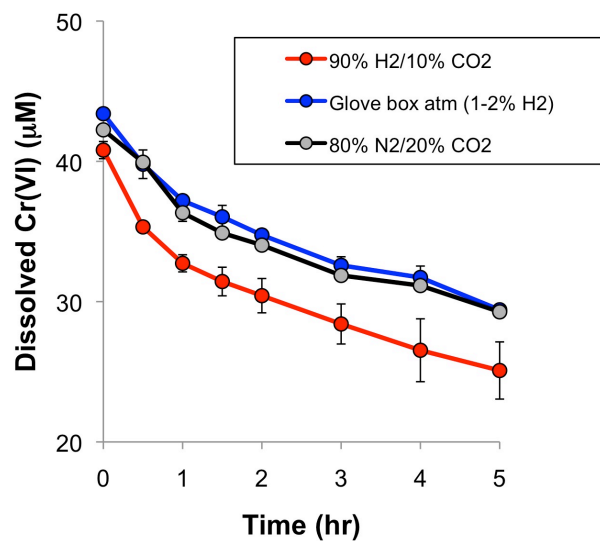

**FIGURE S2.** Results of cell suspension assays to determine the ability of strain HCF1 to use H<sub>2</sub> as the sole electron donor for Cr(VI) reduction. Three hydrogen concentrations were used: (1) no H<sub>2</sub> (80% N<sub>2</sub>/20% CO<sub>2</sub>), (2) the glove box atmosphere (1-2% H<sub>2</sub>), and (3) 90% H<sub>2</sub>/10% CO<sub>2</sub>. Cell densities were approximately  $5.6 \times 10^8$  cells/mL. Data points represent averages of duplicates and error bars represent 1 standard deviation.

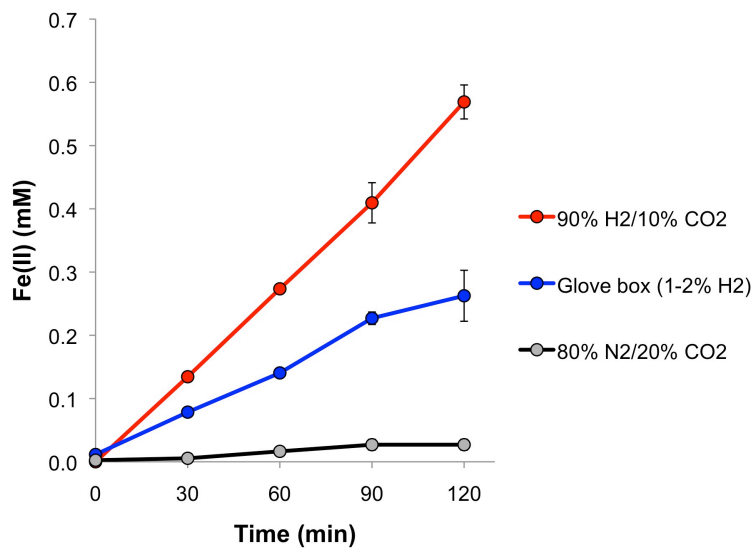

**FIGURE S3.** Results of cell suspension assays to determine the ability of strain HCF1 to use H<sub>2</sub> as the sole electron donor for Fe(III)-NTA reduction. Hydrogen concentrations used were the same as those described in Supplementary Figure 2. Cell densities were approximately  $4.6 \times 10^8$  cells/mL. Data points represent averages of duplicates and error bars represent 1 standard deviation.



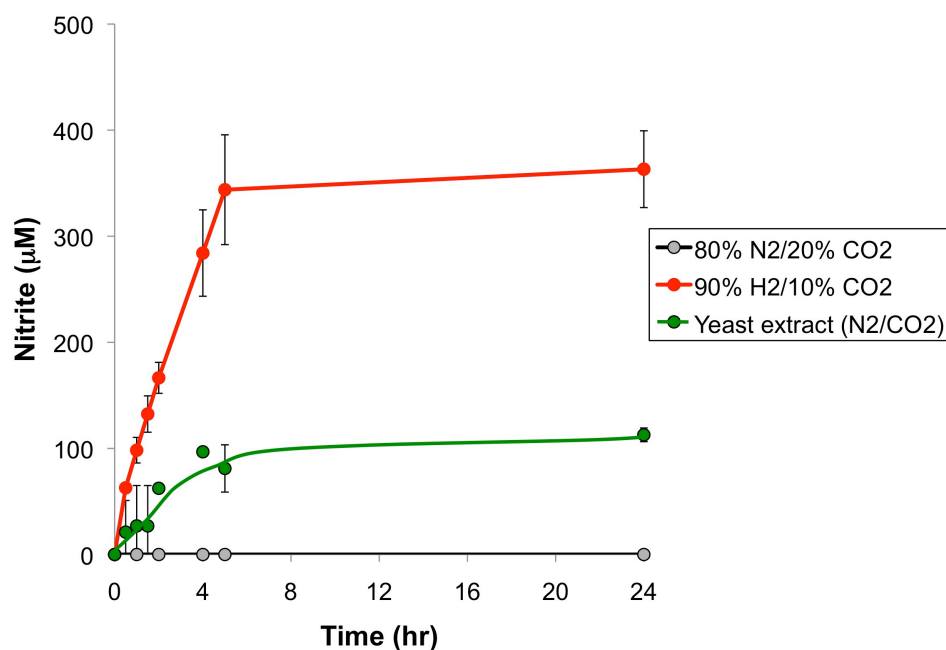

**FIGURE S4.** Results of cell suspension assays to determine the ability of strain HCF1 to use H<sub>2</sub> or yeast extract as the electron donor for nitrate reduction. Two hydrogen concentrations were used: (1) no H<sub>2</sub> (80% N<sub>2</sub>/20% CO<sub>2</sub>) and (2) 90% H<sub>2</sub>/10% CO<sub>2</sub>. When present, yeast extract was at the same concentration as in the growth medium used for the experiment represented in Figure 3 (0.5 g/L). Data points represent averages of duplicates and error bars represent 1 standard deviation. It is clear from the data that yeast extract could only account for a small portion of the nitrite accumulated in the experiment represented in Figure 3A.

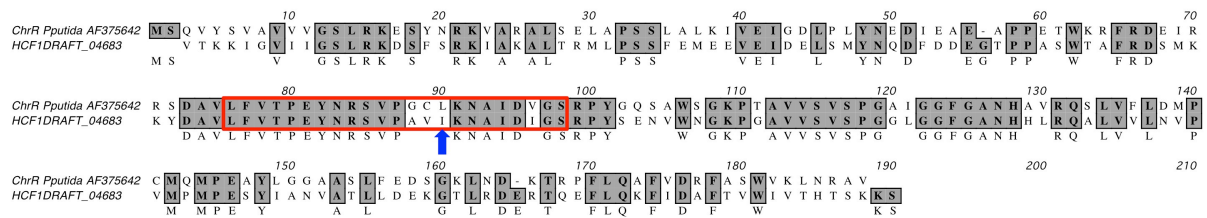

**FIGURE S5.** Alignment of the predicted amino acid sequence of the putative flavoprotein Hcf1DRAFT\_04683 and the sequence of the chromate reductase ChrR from *P. putida* (GenBank AF375642). Identical residues are shaded in gray. The red box highlights a motif characteristic of the NADH\_dh2 family of putative flavin-binding quinone reductases and the blue arrow indicates an L90I deviation in the Hcf1DRAFT\_0468 sequence (see text).
